# Supplementary material for: Identification of natural compounds targeting Annexin A2 with an anti-cancer effect
Source: PubMed Central journal article supplement (PMC5966357; doi:10.1007/s13238-018-0513-z), 2018-03-05

**Figure S1. G-Rg5 and G-Rk1 inhibited NF- $\kappa$ B in an Annexin A2-dependent manner in cancer cell lines but normal cells.** (A) NF- $\kappa$ B activation was examined various cell lines, including HepG2, SW480, PC3, Huh7, HeLa, HEK-293T and CCC-HEL1. (B) Protein level of Annexin A2 in various cell lines was examined by immunoblot and  $\beta$ -actin functioned as a loading control.

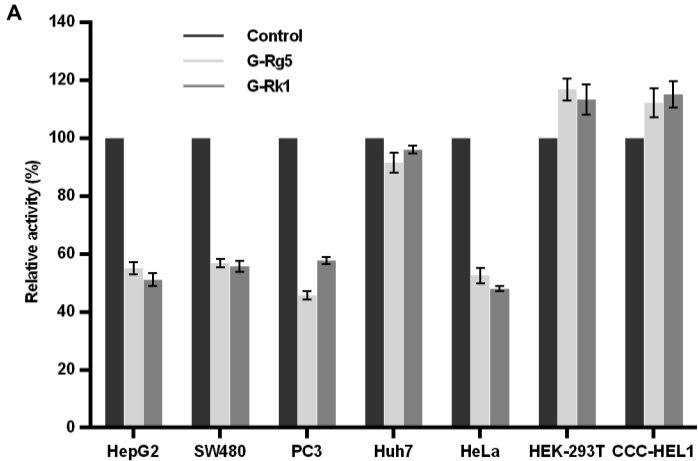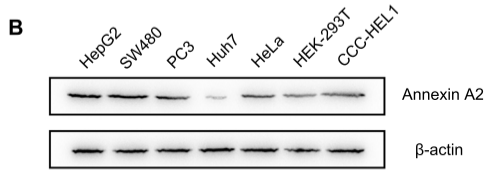

Supplement: 13238_2018_513_MOESM1_ESM.pdf [file 13238_2018_513_MOESM1_ESM.pdf]
